# Supplementary material for: Small but strong: Pivotal roles and potential applications of snoRNAs in hematopoietic malignancies
Source: PubMed Central journal article supplement (PMC9413531; doi:10.3389/fonc.2022.939465), 2022-08-12
Supplement: DataSheet_1.pdf [file DataSheet_1.pdf]

Table 1. Summary of role and potential clinical application of snoRNA in hematopoietic malignancy

| snoRNA                                                | Type        | Expression                     | Disease Subtype            | Potential clinical application | Reference |
|-------------------------------------------------------|-------------|--------------------------------|----------------------------|--------------------------------|-----------|
| ACA11                                                 | orphan      | Overexpression                 | t (4;14)-positive MM       | N.A                            | 46        |
| SNORD123                                              | C/D         | Overexpression                 | MM                         | Prognostic marker              | 49        |
| SNORD115/SNORD116                                     | C/D         | Overexpression                 | TC2 MM                     | Subtype marker                 | 47        |
| SCARNA22                                              | scarna      | Overexpression                 | TC4 MM                     | Pathological marker            | 47        |
| U75                                                   | C/D         | Overexpression                 | ALCL                       | Subtype marker                 | 57        |
| U3                                                    | C/D         | Overexpression                 | ALK+ ALCL                  | Subtypes marker                | 57        |
| HBII-239, U59B, U90                                   | C/D         | Overexpression                 | AITC                       | Prognostic marker              | 57        |
| SNORD34, SNORD35A, SNORD43                            | C/D         | Overexpression                 | t (8;21)-positive AML      | N.A                            | 44        |
| SNORD42A                                              | C/D         | Overexpression                 | AML                        | N.A                            | 59        |
| SNORD112-SNORD114                                     | C/D         | Downregulation                 | AML                        | N.A                            | 42        |
| SNORD112-SNORD114                                     | C/D         | Overexpression                 | APL                        | Subtype marker                 | 42        |
| SNORA70F, SNORA74                                     | H/ACA       | Downregulation                 | CLL                        | Prognostic marker              | 70        |
| SNORD116-118, SNORA74                                 | C/D, H/ACA  | Overexpression                 | CLL                        | Prognostic marker              | 70        |
| SNORA12, SNORA22, SNORA27                             | H/ACA       | Downregulation                 | CLL with IGHV mutation     | Prognostic marker              | 72        |
| SNORD43                                               | C/D         | Overexpression                 | CLL                        | N.A                            | 73        |
| SNORD24, SNORD44, SNORD82, SNORD105, SCARNA6, SCARNA9 | C/D, scarna | Overexpression /Downregulation | ALL                        | Subtype marker                 | 76        |
| SNORD64, SNORD107, SNORD109A, SNORD116                | C/D         | Overexpression                 | BCP-ALL with ERG mutations | Subtype marker                 | 77        |
| SNORA7A, SNORA16A, SNORA70                            | H/ACA       | Downregulation                 | MDS                        | N.A                            | 80        |

N.A, not applied.
