# Supplementary material for: Small but strong: Pivotal roles and potential applications of snoRNAs in hematopoietic malignancies
Source: PubMed Central journal article supplement (PMC9413531; doi:10.3389/fonc.2022.939465), 2022-08-12
Supplement: DataSheet_2.pdf [file DataSheet_2.pdf]

Table 2. Summary of role and potential clinical application of SNHG in hematopoietic malignancy

| SNHG   | Expression     | Disease Subtype     | Potential clinical application | Reference |
|--------|----------------|---------------------|--------------------------------|-----------|
| SNHG18 | Overexpression | t(4;14)-positive MM | N.A                            | 49        |
| SNHG12 | Overexpression | DLBCL               | N.A                            | 50        |
| SNHG14 | Overexpression | DLBCL               | N.A                            | 52        |
| SNHG16 | Overexpression | DLBCL               | N.A                            | 53        |
| SNHG16 | Overexpression | AML                 | N.A                            | 62        |
| SNHG5  | Overexpression | AML                 | N.A                            | 63        |
| SNHG1  | Overexpression | AML                 | Prognostic marker              | 64,65     |
| SNHG4  | Downregulation | AML                 | N.A                            | 66        |
| SNHG5  | Overexpression | CML                 | N.A                            | 68        |
| SNHG5  | Downregulation | T-ALL               | Therapeutic target             | 74        |
| SNHG16 | Overexpression | ALL                 | N.A                            | 75        |

N.A, not applied
